## CORRECTION

# Correction: ADAR1 limits stress granule formation through both translation-dependent and translation-independent mechanisms

Giulia A. Corbet, James M. Burke and Roy Parker

There were errors published in *J. Cell Sci.* (2021) 134, jcs258783 (doi:10.1242/jcs.258783).

The authors wish to correct errors in Fig. 2E and Fig. S1B.

The authors informed the journal that a PABPC1 image in Fig. 2B was inadvertently duplicated in Fig. 2E. Although the image depicts the same type of cells and experimental conditions, it is not the appropriate matched control image for the cells shown in the left-hand panel of Fig. 2E (Puromycin column). The corrected and original panels are shown below. Both the online full text and PDF versions of the paper have been corrected.

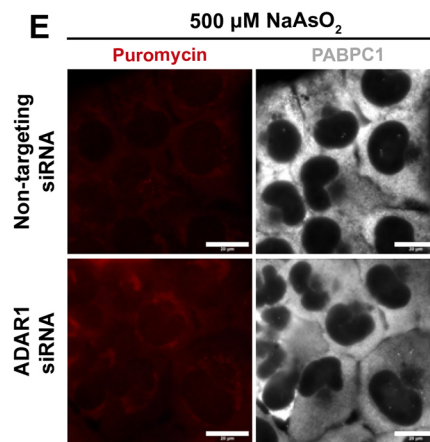

**Fig. 2E (corrected panel). ADAR1 regulates stress granules in a translation-independent manner.** (E) Puromycin labeling and IF for PABPC1 in G3BP1/2 KO cells stressed for 1 h with 500  $\mu\text{M}$  NaAsO<sub>2</sub> and treated with ADAR1 siRNA or non-targeting siRNA. Scale bars: 20  $\mu\text{m}$ .

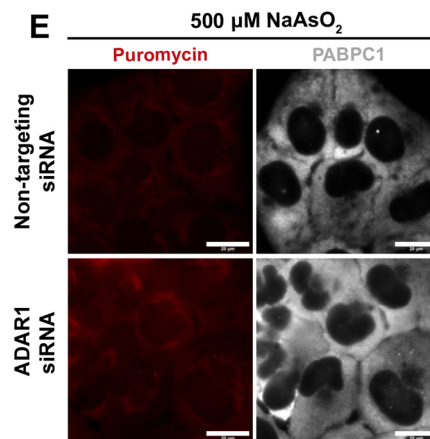

**Fig. 2E (original panel). ADAR1 regulates stress granules in a translation-independent manner.** (E) Puromycin labeling and IF for PABPC1 in G3BP1/2 KO cells stressed for 1 h with 500  $\mu\text{M}$  NaAsO<sub>2</sub> and treated with ADAR1 siRNA or non-targeting siRNA. Scale bars: 20  $\mu\text{m}$ .

The authors also informed the journal that the GAPDH western blot in Fig. S1B was inadvertently placed twice in the panel, with two differently cropped versions of the same image overlapping each other. The corrected panel and original panels are shown below, and the figure has now been corrected online.

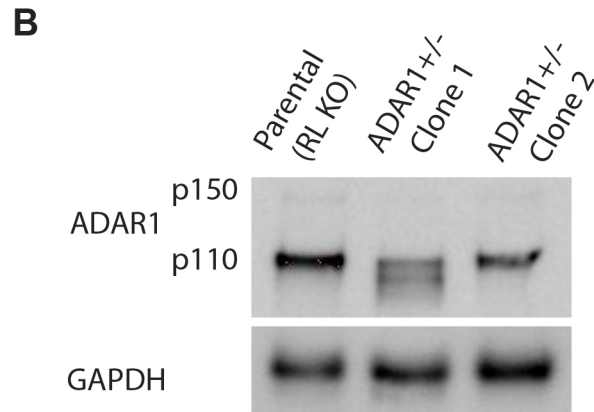

**Fig. S1B (corrected panel).** (B) Western blotting analysis of ADAR1 and GAPDH in ADAR1<sup>+/-</sup> clones and parental RNase L KO cells.

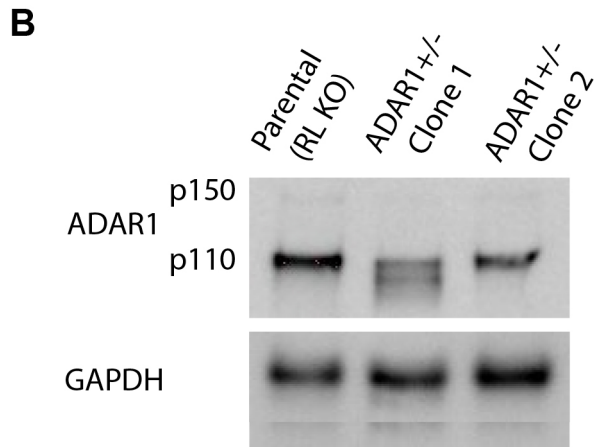

**Fig. S1B (original panel).** (B) Western blotting analysis of ADAR1 and GAPDH in ADAR1<sup>+/-</sup> clones and parental RNase L KO cells.

The authors apologise to readers for these errors, which do not impact the results or the conclusions of the article.
